# Supplementary material
Source: Springer Nature journal article supplement (https://www.springermedizin.de/resource/supplementary/12885_2013_4153_MOESM2_ESM.pdf/9465582)
Supplement: MOESM2 [file 9465582]

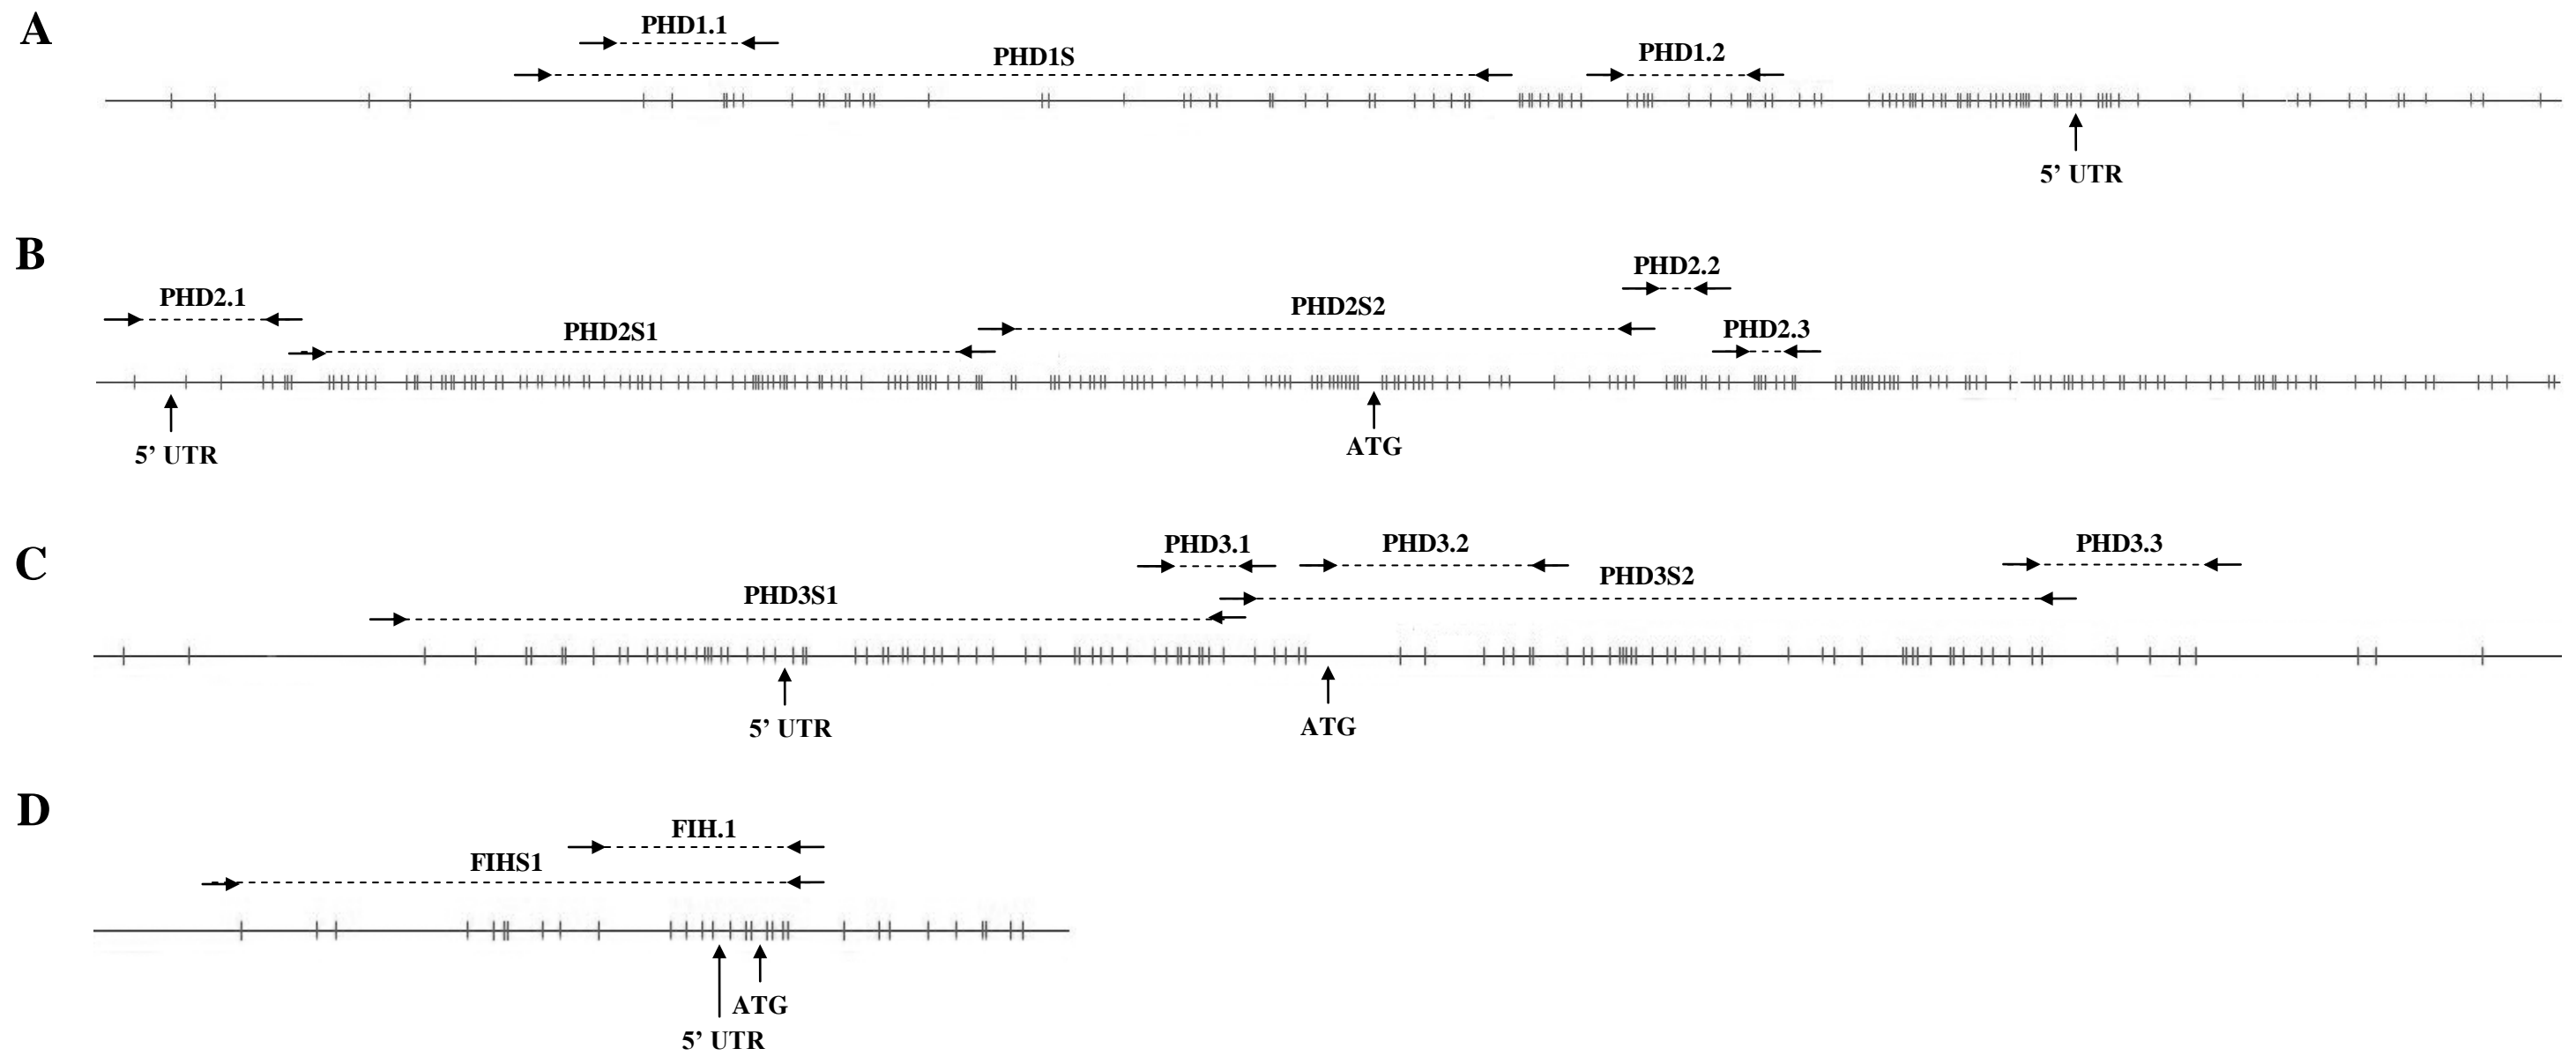

**Additional file 2. Schematic representation of the CpG distribution within 5' regulatory region of the *PHD1* (A), *PHD2* (B), *PHD3* (C) and *FIH* (D) gene.** The CpG dinucleotides are represented by vertical tick marks and the position of 5'UTR and ATG sites are depicted with arrow. Horizontal arrows with dotted line correspond to the position of primers and PCR product, respectively used for the bisulfite sequencing and HRM analysis.
